# Supplementary material for: Traditional Chinese Medicine for Sleep Disorders Linked with Malignant Neoplasms: A Bibliometric Analysis of Research Trends and Emerging Priorities
Source: Research Square preprint supplement (doi:10.21203/rs.3.rs-7286304/v1), 2025-10-10
Supplement: Supplementary file 1 [file 461cc1d04e89b4782606d7e8.docx]

**Supplementary Information**

Article title: **Traditional Chinese Medicine for Sleep Disorders Linked with Malignant Neoplasms: A Bibliometric Analysis of Research Trends and Emerging Priorities**

Journal name: ***Supportive Care in Cancer***

Authors: Luning Wang, Zhipeng Wang, Zejun Liu, Changsong Wang

Corresponding author: Changsong Wang

Department of Traditional Chinese Medicine, Zhongda Hospital Southeast University

Nanjing, China, 210009

Email: 101005664@seu.edu.cn

**Online Resource 1. Search strategy**

The data source for the bibliometric analysis was the Web of Science Core Collection (WoSSC) database, with data retrieval executed on November 13, 2024. The following search strategy was applied:

TS=(“malignan*” OR “cancer*” OR “tumor*” OR “tumour*” OR “neoplas*” OR “carcinoma*” OR “oncolog*” OR “metasta*” OR “sarcoma*” OR “melanoma*” OR “leukemia*” OR “leukaemia*” OR “lymphoma*”) AND TS=(“sleep* disorder*” OR “sleep* disturbance*” OR “sleep* problem*” OR “insomnia*” OR “dyssomnia*” OR “parasomnia*” OR “sleep* apnea*” OR “sleep-wake*” OR “circadian rhythm*” OR “sleep* difficult*” OR “poor sleep*” OR “disturbed sleep*” OR “sleep quality*” OR “sleep pattern*” OR “sleep habit*”) AND TS=(“traditional Chinese medicine” OR “TCM” OR “Chinese medicine*” OR “Chinese herb*” OR “Chinese drug*” OR “herbal medicine*” OR “acupuncture*” OR “moxibustion*” OR “tuina*” OR “meridian*” OR “Chinese formulae*” OR “Chinese formula*” OR “decoction*” OR “Chinese therap*” OR “Chinese treatment*” OR “Chinese preparation*” OR “Chinese materia medica*” OR “zhong yi*” OR “zhongyi*” OR “oriental medicine*” OR “Asian medicine*”).

***Data analysis***

VOSviewer is adept at performing co-authorship, co-occurrence, and co-citation analyses on extensive literature datasets, thereby generating knowledge maps that elucidate the relationships among authors, journals, and other pertinent entities. This tool has been applied extensively in bibliometric research. CiteSpace is an additional software tool designed to visualize and analyze networks of scientific literature, facilitating the exploration of knowledge domains and identification of key research trends. Its capabilities include the visualization of co-citation networks, the identification of significant literature and influential authors within the domain, and the detection of emerging trends through the analysis of co-citation bursts. Furthermore, CiteSpace illustrates keyword co-occurrence networks, which aid in recognizing thematic clusters and their progression over time. For the analysis of keywords and reference clustering, we used CiteSpace version 6.4. R1, which provided insights into the developmental dynamics and prospective trajectories within the research landscape.

The bibliometrix package in R was applied to create a historiograph of the references illustrating the citation interrelations in the body of literature.

Initially, raw data extracted from the WoSCC database were imported into Microsoft Excel 2021 for preliminary organization. Only the titles and abstracts of each article were retained to create the original corpus. To guarantee the reliability and validity of our findings, we established a word-frequency threshold, eliminated commonly used stop words, and designated specific terms. LDA topic modeling and word cloud generation were executed using KH Coder and an online word cloud tool. In the conclusion phase, we manually assigned names to each topic based on the 10 most notable articles and 20 thematic terms identified within each topic.

|  |
| --- |
| **Online Resource 2.** Topic quantity analysis |
